# Supplementary material for: Main Outcomes of a Peer-Led Healthy Lifestyle Intervention for People With Serious Mental Illness in Supportive Housing
Source: Atypon-hosted journal article supplement (doi:10.1176/appi.ps.202000304), 2020-12-18
Supplement: appi.ps.202000304.ds001.pdf [file appi.ps.202000304.ds001.pdf]

### Online Supplement

Supplemental Table 1. Outcomes of regression analysis with propensity score weighting analysis<sup>a</sup>

| Outcomes                                                  | Average Treatment Effect <sup>b</sup> |            | Average Treatment Effect for Treated <sup>c</sup> |            |
|-----------------------------------------------------------|---------------------------------------|------------|---------------------------------------------------|------------|
|                                                           | OR                                    | 95% CI     | OR                                                | 95% CI     |
| ≥ 5% weight loss from baseline                            |                                       |            |                                                   |            |
| 6 months                                                  | 1.08                                  | 0.54, 2.14 | 0.99                                              | 0.49, 1.98 |
| 12 months                                                 | 1.57                                  | 0.88, 2.80 | 1.60                                              | 0.88, 2.90 |
| 18 months                                                 | 1.04                                  | 0.59, 1.84 | 1.15                                              | 0.64, 2.07 |
| ≥ 50 meters increase from baseline on 6MWT <sup>d</sup>   |                                       |            |                                                   |            |
| 6 months                                                  | 1.07                                  | 0.90, 3.21 | 1.45                                              | 0.76, 2.78 |
| 12 months                                                 | 1.12                                  | 0.61, 2.05 | 1.12                                              | 0.60, 2.10 |
| 18 months                                                 | 0.94                                  | 0.49, 1.80 | 1.06                                              | 0.54, 2.08 |
| Clinically significant reduction in CVD risk <sup>d</sup> |                                       |            |                                                   |            |
| 6 months                                                  | 1.64                                  | 0.97, 2.79 | 1.45                                              | 0.84, 2.51 |
| 12 months                                                 | 1.12                                  | 0.61, 2.05 | 1.12                                              | 0.60, 2.10 |
| 18 months                                                 | 0.88                                  | 0.51, 1.51 | 0.94                                              | 0.53, 1.66 |

Note: <sup>a</sup>Logistic regression adjusting for age, race/ethnicity, baseline BMI and site. Usual care is the reference group in all models <sup>b</sup>Weight for a treated participant is  $1/P$ , and for a control participant is  $[1/(1-P)]$  when estimating ATE.  $P$  denotes the predicted probability from logistic regression using age, race/ethnicity, BMI and No. of medical conditions as covariates. <sup>c</sup>Weight for a treated participant is 1 and for a control participant is  $[P/(1-P)]$  when estimating ATT. <sup>d</sup>6MWT = six-minutes walking test. <sup>e</sup>Clinically significant reduction in cardiovascular disease risk is defined as either achieving ≥ 5% weight loss from baseline or ≥ 50 meters increase from baseline on the 6-minutes walking test.

Supplemental Table 2. Use of usual care services by study condition

|           | Usual Care |    | PGLB |    | P value <sup>a</sup> |
|-----------|------------|----|------|----|----------------------|
|           | N          | %  | N    | %  |                      |
| Baseline  | 55         | 36 | 43   | 28 | 0.14                 |
| 6 months  | 37         | 26 | 30   | 22 | 0.42                 |
| 12 months | 31         | 23 | 23   | 18 | 0.35                 |
| 18 months | 27         | 21 | 22   | 18 | 0.61                 |

Note: <sup>a</sup>P values for Chi-square. Per journal style all percentages are rounded to whole numbers.

Supplemental Table 3. Mean changes in weight and 6-minutes walking test by study condition

|                                                                  | Usual Care |        | PGLB  |       | P value <sup>a</sup> |
|------------------------------------------------------------------|------------|--------|-------|-------|----------------------|
|                                                                  | Mean       | SD     | Mean  | SD    |                      |
| Mean weight change from baseline (pounds)                        |            |        |       |       |                      |
| 6 months                                                         | -1.14      | 10.65  | -0.98 | 13.36 | 0.81                 |
| 12 months                                                        | -3.19      | 15.03  | -3.02 | 19.80 | 0.86                 |
| 18 months                                                        | -2.9       | 17.94  | -2.38 | 20.75 | 0.61                 |
| Mean change in the 6-minutes walking test from baseline (meters) |            |        |       |       |                      |
| 6 months                                                         | -5.6       | 83.32  | 8.4   | 78.26 | 0.64                 |
| 12 months                                                        | -6.4       | 89.93  | 2.0   | 97.08 | 0.88                 |
| 18 months                                                        | -6.53      | 102.88 | 5.61  | 88.39 | 0.88                 |

Note: <sup>a</sup>P values for Ordinary Least Square models adjusting for site.

Supplemental Table 4. Use of PGLB strategies by study condition

|                                 | Usual Care |    | PGLB |    | P value <sup>a</sup> |
|---------------------------------|------------|----|------|----|----------------------|
|                                 | N          | %  | N    | %  |                      |
| <b>Tracking eating</b>          |            |    |      |    |                      |
| 6 months                        | 77         | 55 | 100  | 73 | <b>0.002</b>         |
| 12 months                       | 75         | 56 | 82   | 67 | 0.092                |
| 18 months                       | 59         | 45 | 73   | 60 | <b>0.018</b>         |
| <b>Tracking exercise</b>        |            |    |      |    |                      |
| 6 months                        | 72         | 52 | 98   | 72 | <b>0.001</b>         |
| 12 months                       | 67         | 50 | 78   | 63 | <b>0.035</b>         |
| 18 months                       | 58         | 45 | 70   | 58 | <b>0.042</b>         |
| <b>Self-weighing</b>            |            |    |      |    |                      |
| 6 months                        | 41         | 30 | 96   | 70 | <b>&lt;0.001</b>     |
| 12 months                       | 36         | 27 | 77   | 63 | <b>&lt;0.001</b>     |
| 18 months                       | 36         | 28 | 70   | 58 | <b>&lt;0.001</b>     |
| <b>Using pedometer</b>          |            |    |      |    |                      |
| 6 months                        | 5          | 4  | 59   | 43 | <b>&lt;0.001</b>     |
| 12 months                       | 5          | 4  | 38   | 31 | <b>&lt;0.001</b>     |
| 18 months                       | 5          | 4  | 25   | 21 | <b>&lt;0.001</b>     |
| <b>Setting weight loss goal</b> |            |    |      |    |                      |
| 6 months                        | 74         | 54 | 91   | 66 | <b>0.030</b>         |
| 12 months                       | 62         | 47 | 83   | 68 | <b>0.001</b>         |
| 18 months                       | 58         | 45 | 70   | 58 | <b>0.036</b>         |
| <b>Setting exercise goal</b>    |            |    |      |    |                      |
| 6 months                        | 74         | 54 | 85   | 62 | 0.157                |
| 12 months                       | 63         | 47 | 75   | 61 | <b>0.024</b>         |
| 18 months                       | 64         | 49 | 64   | 53 | 0.517                |

Note: <sup>a</sup>P values for Chi-square. Per journal style all percentages are rounded to whole numbers.

**Figure 1. Study Flow Diagram**

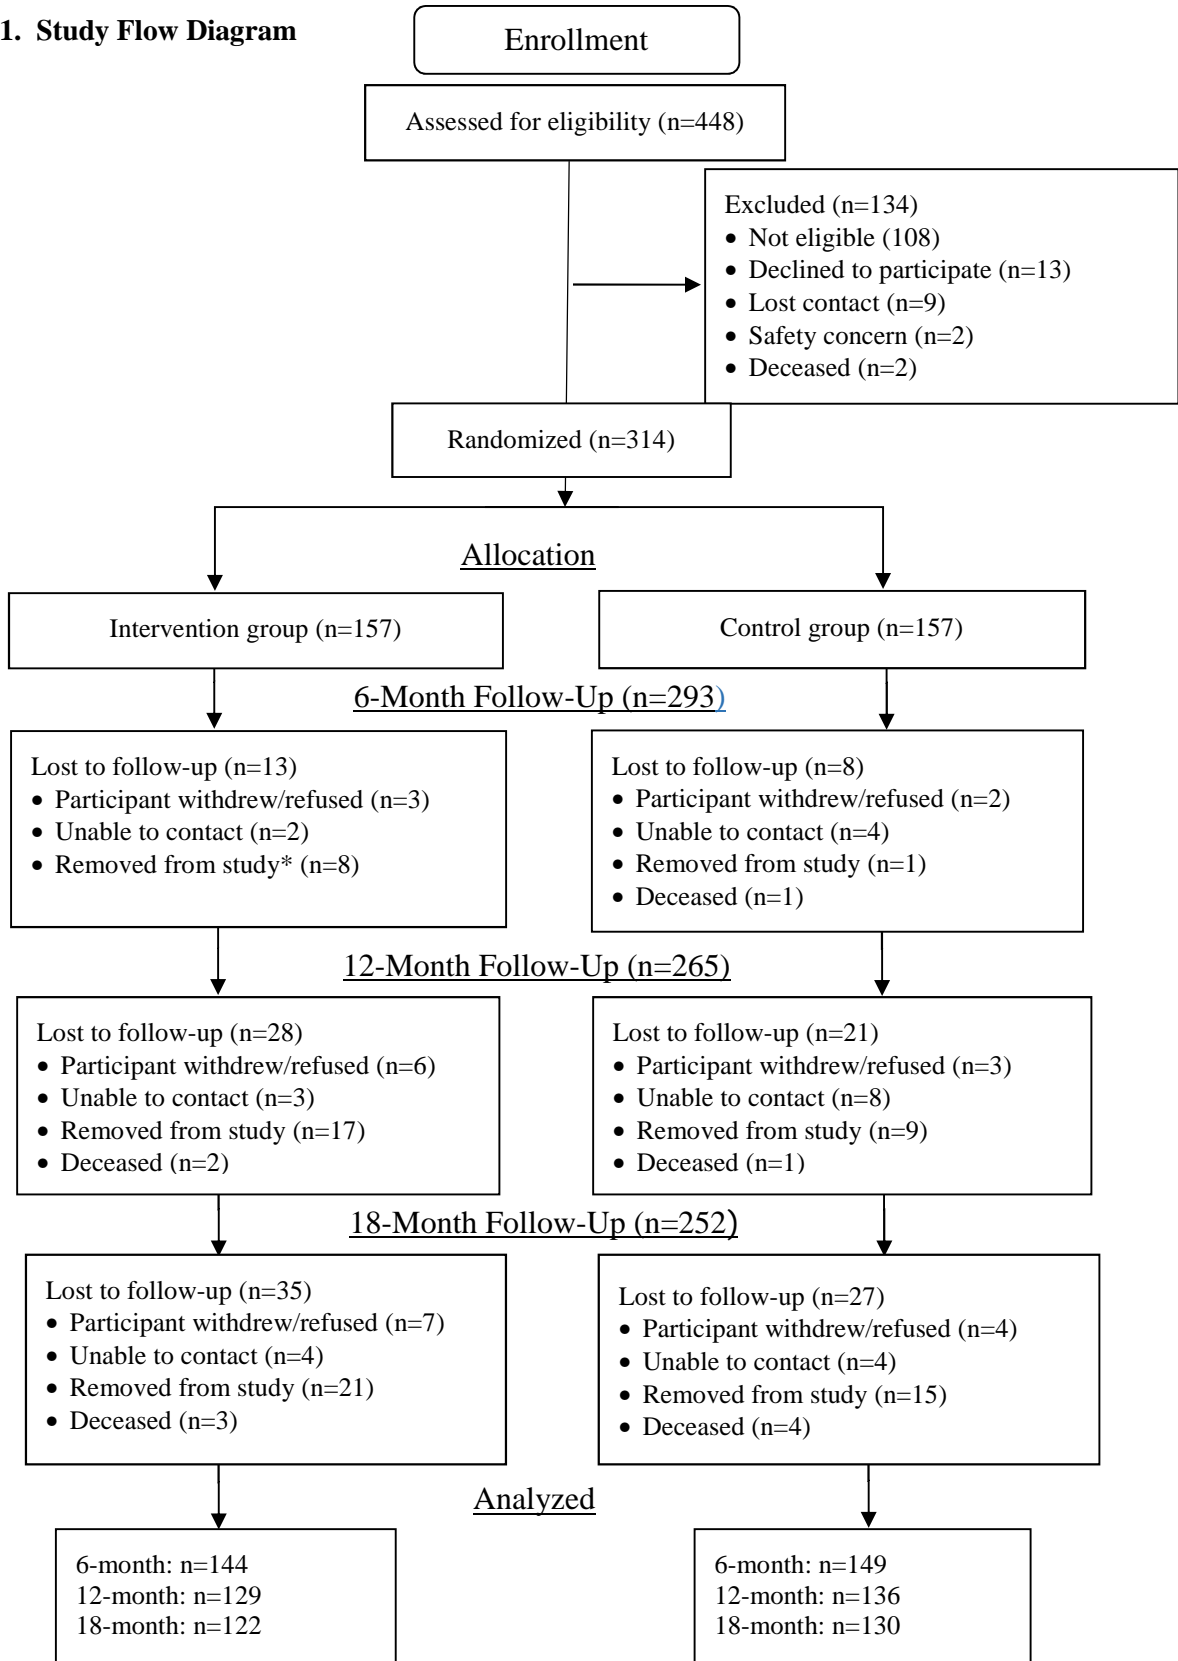

\*The most frequent reason for removal from study was participant no longer being a client of the supportive housing agency. Other reasons included participant developing conditions meeting exclusionary criteria, such as substance abuse that required detoxification, potential for harm to self/others, or medical conditions contraindicated with weight loss, none of which were related to participation in the study.
